# Supplementary material for: Formation of quasi-single crystalline porous ZnO nanostructures with a single large cavity
Source: Royal Society of Chemistry journal article supplement (doi:10.1039/c1nr10609k), 2011-01-01
Supplement: c1nr10609k.pdf [file c1nr10609k.pdf]

## Electronic Supplementary Information (ESI)

### Formation of quasi-single crystalline porous ZnO nanostructures with a single large cavity

Seungho Cho, Semi Kim, Dae-Won Jung and Kun-Hong Lee\*

Department of Chemical Engineering, Department of Mechanical Engineering and National Center for Nanomaterials Technology (NCNT), Pohang University of Science and Technology (POSTECH), San 31, Hyoja-Dong, Nam-Gu, Pohang, Gyungbuk, Korea, 790-784

\*Corresponding author: E-mail: ce20047@postech.ac.kr

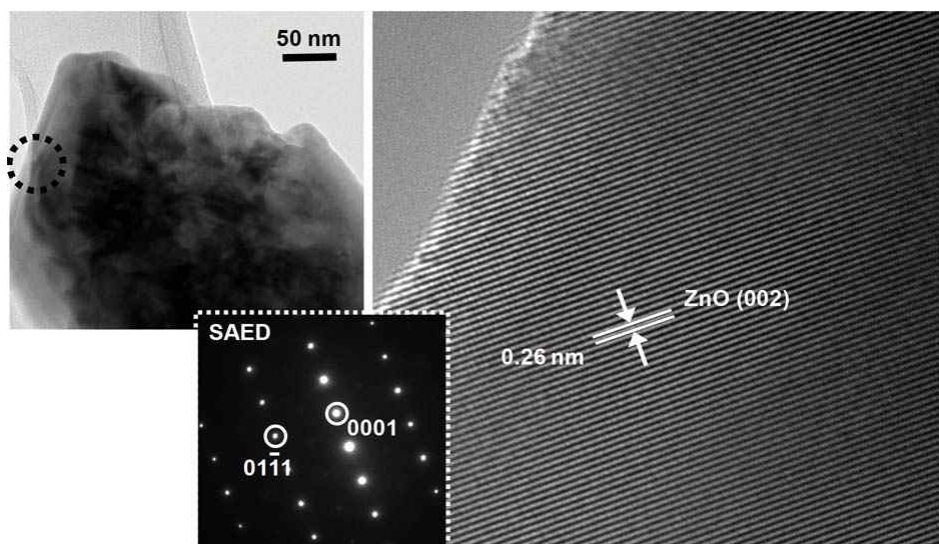

**Figure S1.** TEM images and the corresponding SAED image of a ZnO nanostructure synthesized from the reaction of an aqueous solution containing 0.005 M zinc nitrate hexahydrate and 0.06 M HMT at the 85°C time point.
